# Supplementary material for: A new core topology in hexanuclear iron(III) carboxylate chemistry: [Fe6O3(O2CMe)9(OEt)2(bpy)2](ClO4) †
Source: Royal Society of Chemistry journal article supplement (doi:10.1039/b006150f), 2000-01-01
Supplement: b006150f.doc [file b006150f.doc]

**Table S1.** Selected Interatomic Distances (Å) and Angles () for [Fe6O3(O2CMe)9(OEt)2(bpy)2](ClO4) (**3**)

Fe(1) Fe(2) 3.287(1)

Fe(1) Fe(3) 3.419(1)

Fe(4) Fe(6) 3.371(1)

Fe(5) Fe(6) 3.325(1)

Fe(2) Fe(3) 2.955(1)

Fe(1) O(7) 1.841(2)

Fe(1) O(40) 2.077(2)

Fe(1) O(44) 1.984(2)

Fe(1) O(48) 2.023(2)

Fe(1) N(10) 2.147(3)

Fe(1) N(21) 2.195(2)

Fe(2) O(7) 1.948(2)

Fe(2) O(8) 2.014(2)

Fe(2) O(34) 1.999(2)

Fe(2) O(42) 2.020(2)

Fe(2) O(46) 2.043(2)

Fe(2) O(52) 2.018(2)

Fe(3) O(7) 1.937(2)

Fe(3) O(8) 2.028(2)

Fe(3) O(37) 1.990(2)

Fe(3) O(50) 2.031(2)

Fe(3) O(56) 2.049(2)

Fe(3) O(60) 2.039(2)

Fe(4) Fe(5) 2.954(1)

Fe(2) Fe(4) 3.010(1)

Fe(3) Fe(5) 3.058(1)

Fe(2) Fe(5) 3.957(1)

Fe(3) Fe(4) 3.511(1)

Fe(4) O(8) 2.013(2)

Fe(4) O(9) 1.940(2)

Fe(4) O(34) 1.958(2)

Fe(4) O(54) 2.070(3)

Fe(4) O(58) 2.045(3)

Fe(4) O(68) 1.998(2)

Fe(5) O(8) 2.025(2)

Fe(5) O(9) 1.949(2)

Fe(5) O(37) 2.017(2)

Fe(5) O(62) 2.005(2)

Fe(5) O(64) 2.047(2)

Fe(5) O(72) 2.016(2)

Fe(6) O(9) 1.833(2)

Fe(6) O(66) 1.967(2)

Fe(6) O(70) 2.034(2)

Fe(6) O(74) 2.069(2)

Fe(6) N(22) 2.142(3)

Fe(6) N(33) 2.190(2)

O(7) Fe(1) O(40) 94.96(8)

O(7) Fe(1) O(44) 98.67(8)

O(7) Fe(1) O(48) 95.86(8)

O(7) Fe(1) N(10) 98.97(9)

O(7) Fe(1) N(21) 173.92(10)

O(40) Fe(1) O(44) 92.71(9)

O(40) Fe(1) O(48) 167.21(8)

O(40) Fe(1) N(10) 84.14(9)

O(40) Fe(1) N(21) 83.34(8)

O(44) Fe(1) O(48) 92.37(8)

O(44) Fe(1) N(10) 162.29(8)

O(44) Fe(1) N(21) 87.26(9)

O(48) Fe(1) N(10) 87.46(9)

O(48) Fe(1) N(21) 85.19(8)

N(10) Fe(1) N(21) 75.07(9)

O(7) Fe(2) O(8) 83.24(8)

O(7) Fe(2) O(34) 95.89(9)

O(7) Fe(2) O(42) 94.93(8)

O(7) Fe(2) O(46) 90.98(8)

O(7) Fe(2) O(52) 171.98(9)

O(8) Fe(2) O(34) 78.55(9)

O(8) Fe(2) O(42) 167.26(9)

O(8) Fe(2) O(46) 101.76(8)

O(8) Fe(2) O(52) 94.18(8)

O(34) Fe(2) O(42) 89.13(9)

O(34) Fe(2) O(46) 173.11(9)

O(34) Fe(2) O(52) 91.02(10)

O(42) Fe(2) O(46) 90.86(9)

O(42) Fe(2) O(52) 89.23(9)

O(46) Fe(2) O(52) 82.09(9)

O(7) Fe(3) O(8) 83.13(8)

O(7) Fe(3) O(37) 161.23(8)

O(7) Fe(3) O(50) 93.50(8)

O(7) Fe(3) O(56) 92.05(9)

O(7) Fe(3) O(60) 95.16(9)

O(8) Fe(3) O(37) 78.59(8)

O(8) Fe(3) O(50) 171.06(8)

O(8) Fe(3) O(56) 101.71(9)

O(8) Fe(3) O(60) 89.72(8)

O(37) Fe(3) O(50) 105.20(8)

O(37) Fe(3) O(56) 87.52(8)

O(37) Fe(3) O(60) 89.03(8)

O(50) Fe(3) O(56) 86.65(9)

O(50) Fe(3) O(60) 82.32(8)

O(56) Fe(3) O(60) 167.15(9)

O(8) Fe(4) O(9) 83.67(8)

O(8) Fe(4) O(34) 79.54(8)

O(8) Fe(4) O(54) 89.36(9)

O(8) Fe(4) O(58) 100.20(9)

O(8) Fe(4) O(68) 171.21(11)

O(9) Fe(4) O(34) 163.08(9)

O(9) Fe(4) O(54) 92.08(9)

O(9) Fe(4) O(58) 90.55(9)

O(9) Fe(4) O(68) 96.08(9)

O(34) Fe(4) O(54) 89.75(10)

O(34) Fe(4) O(58) 90.44(10)

O(34) Fe(4) O(68) 100.82(9)

O(54) Fe(4) O(58) 170.32(9)

O(54) Fe(4) O(68) 81.87(11)

O(58) Fe(4) O(68) 88.59(11)

O(8) Fe(5) O(9) 83.13(8)

O(8) Fe(5) O(37) 78.04(8)

O(8) Fe(5) O(62) 93.08(8)

O(8) Fe(5) O(64) 100.91(9)

O(8) Fe(5) O(72) 165.13(10)

O(9) Fe(5) O(37) 98.11(9)

O(9) Fe(5) O(62) 171.31(9)

O(9) Fe(5) O(64) 90.42(9)

O(9) Fe(5) O(72) 92.47(9)

O(37) Fe(5) O(62) 88.71(8)

O(37) Fe(5) O(64) 171.19(8)

O(37) Fe(5) O(72) 88.59(9)

O(62) Fe(5) O(64) 82.60(8)

O(62) Fe(5) O(72) 93.09(10)

O(64) Fe(5) O(72) 93.29(9)

O(9) Fe(6) O(66) 97.81(8)

O(9) Fe(6) O(70) 98.57(9)

O(9) Fe(6) O(74) 93.83(9)

O(9) Fe(6) N(22) 98.79(9)

O(9) Fe(6) N(33) 173.53(9)

O(66) Fe(6) O(70) 94.62(9)

O(66) Fe(6) O(74) 92.21(9)

O(66) Fe(6) N(22) 162.87(9)

O(66) Fe(6) N(33) 88.63(9)

O(70) Fe(6) O(74) 164.88(8)

O(70) Fe(6) N(22) 87.07(10)

O(70) Fe(6) N(33) 81.38(9)

O(74) Fe(6) N(22) 82.50(10)

O(74) Fe(6) N(33) 85.32(9)

N(22) Fe(6) N(33) 74.74(9)

Fe(1) O(7) Fe(2) 120.37(11)

Fe(1) O(7) Fe(3) 129.63(11)

Fe(2) O(7) Fe(3) 99.05(8)

Fe(2) O(8) Fe(3) 93.96(8)

Fe(2) O(8) Fe(4) 96.76(9)

Fe(2) O(8) Fe(5) 156.87(12)

Fe(3) O(8) Fe(4) 120.68(10)

Fe(3) O(8) Fe(5) 97.99(9)

Fe(4) O(8) Fe(5) 94.06(8)

Fe(4) O(9) Fe(5) 98.87(8)

Fe(4) O(9) Fe(6) 126.60(11)

Fe(5) O(9) Fe(6) 123.07(11)

Fe(2) O(34) Fe(4) 99.04(10)

Fe(3) O(37) Fe(5) 99.50(9)
